# Supplementary material
Source: PubMed Central journal article supplement (PMC4822470)

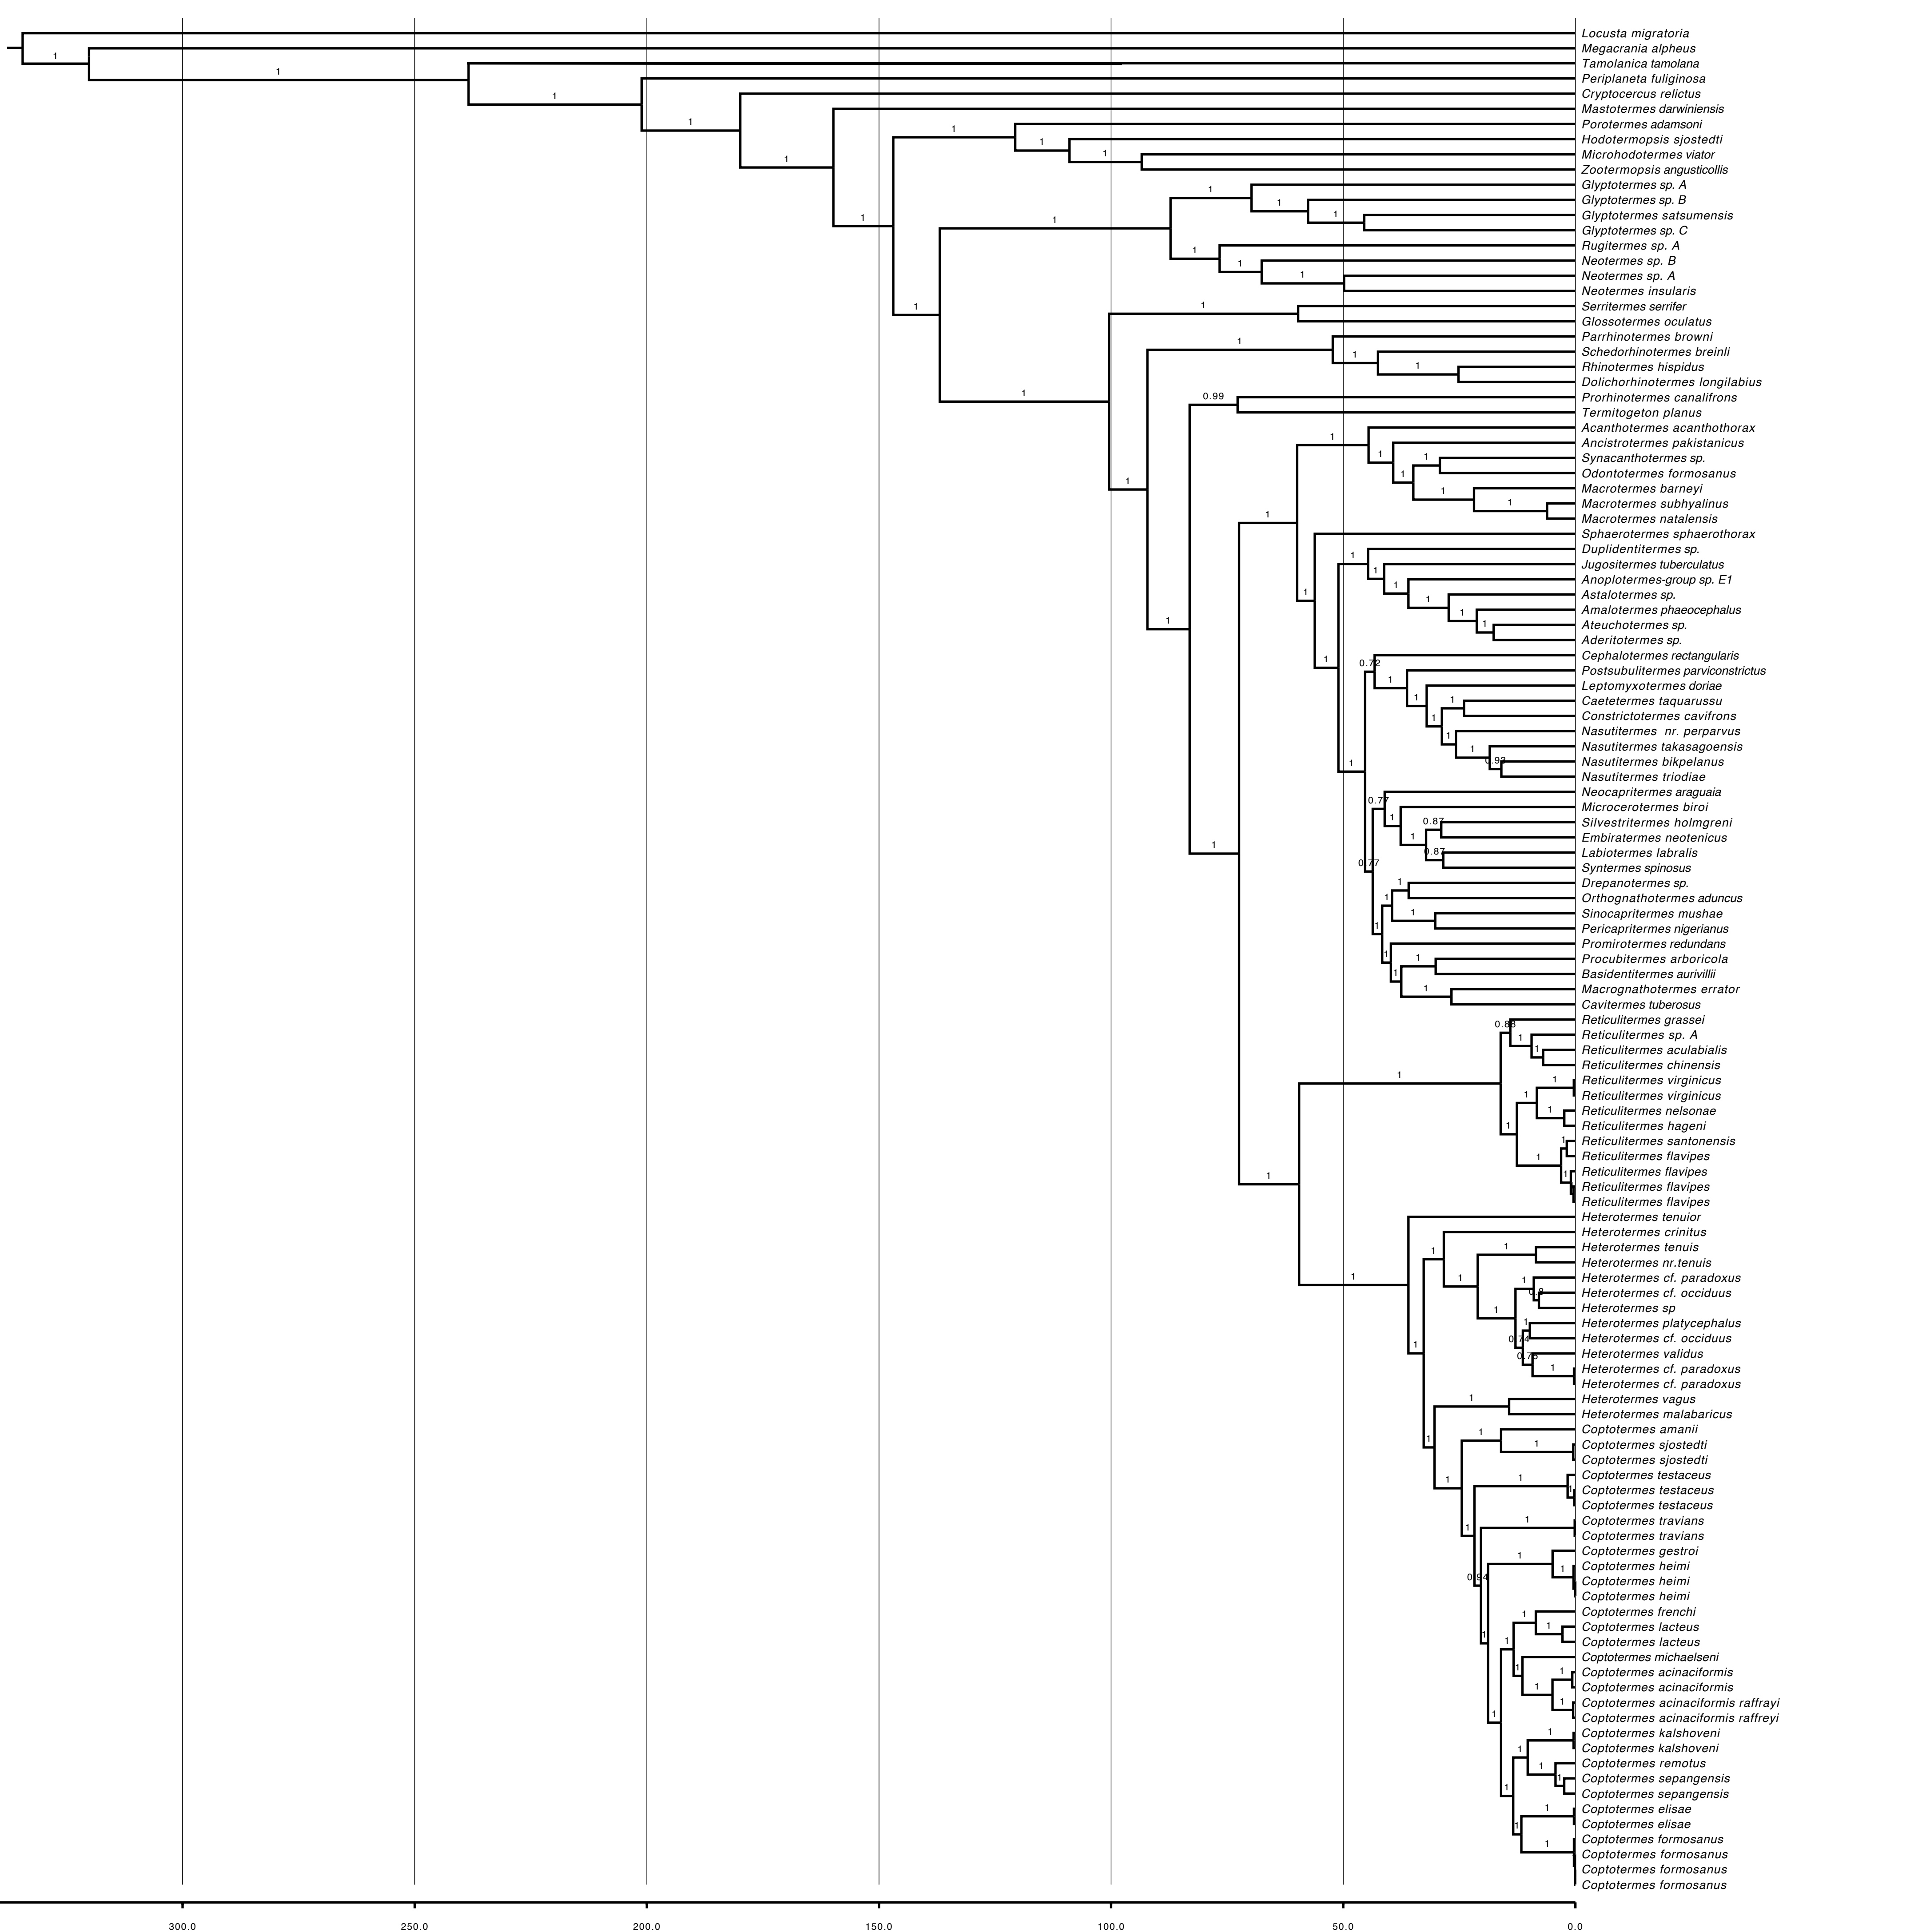

Supplement: rspb20160179supp7.pdf [file rspb20160179supp7.pdf]
